# Supplementary material for: Lung Function in Young Adults and Risk of Cardiovascular Events Over 29 Years: The CARDIA Study
Source: PubMed Central journal article supplement — J Am Heart Assoc. 2018 Dec 10;7(24):e010672. doi: 10.1161/JAHA.118.010672 (PMC6405620; doi:10.1161/jaha.118.010672), 2018-12-10
Supplement: JAH3-7-e010672-s001.pdf [file JAH3-7-e010672-s001.pdf]

# **SUPPLEMENTAL MATERIAL**

**Table S1. Association between lung function measured at exam year 10 (mean age 35, range 28-40) and the development of incident cardiovascular risk factors by the year 20 examination.**

|                                      | <b>Incident Hypertension</b><br><br><b>OR (95% CI)</b><br><br><b>Cases/N=494/2192</b> | <b>Incident Hypercholesterolemia</b><br><br><b>OR (95% CI)</b><br><br><b>Cases/N=587/2140</b> | <b>Incident Diabetes</b><br><br><b>OR (95% CI)</b><br><br><b>Cases/N=142/2674</b> |
|--------------------------------------|---------------------------------------------------------------------------------------|-----------------------------------------------------------------------------------------------|-----------------------------------------------------------------------------------|
| <b>FEV<sub>1</sub> (% predicted)</b> | 1.09 (1.00, 1.19)                                                                     | 0.96 (0.89, 1.04)                                                                             | 1.18 (1.03, 1.36)                                                                 |
| <b>FVC (% predicted)</b>             | 1.04 (0.95, 1.14)                                                                     | 0.96 (0.89, 1.04)                                                                             | 1.27 (1.10, 1.48)                                                                 |
| <b>FEV<sub>1</sub>/FVC (%)</b>       | 1.09 (1.00, 1.20)                                                                     | 1.00 (0.92, 1.08)                                                                             | 0.94 (0.80, 1.09)                                                                 |

Incident in this case is defined by being present at the year 20 examination but not at year 10. Odds ratios are expressed per -10 units of the % predicted FEV<sub>1</sub> or FVC or -5 units of the FEV<sub>1</sub>/FVC.

Hypertension is defined as blood pressure greater than or equal to 130/80 mm Hg or use of anti-hypertensive medication. Hypercholesterolemia is defined as total cholesterol greater than 200 mg/dL or use of cholesterol lower medication. Diabetes is defined as fasting glucose 126 mg/dL or greater or use of anti-diabetic medication.

Covariates: Race-sex group, age, BMI, and smoking status at the time of lung function measurement (year 10) and change in BMI between years 10 and 20.

**Figure S1. Number of participants included in the analytic cohorts based on available data.**

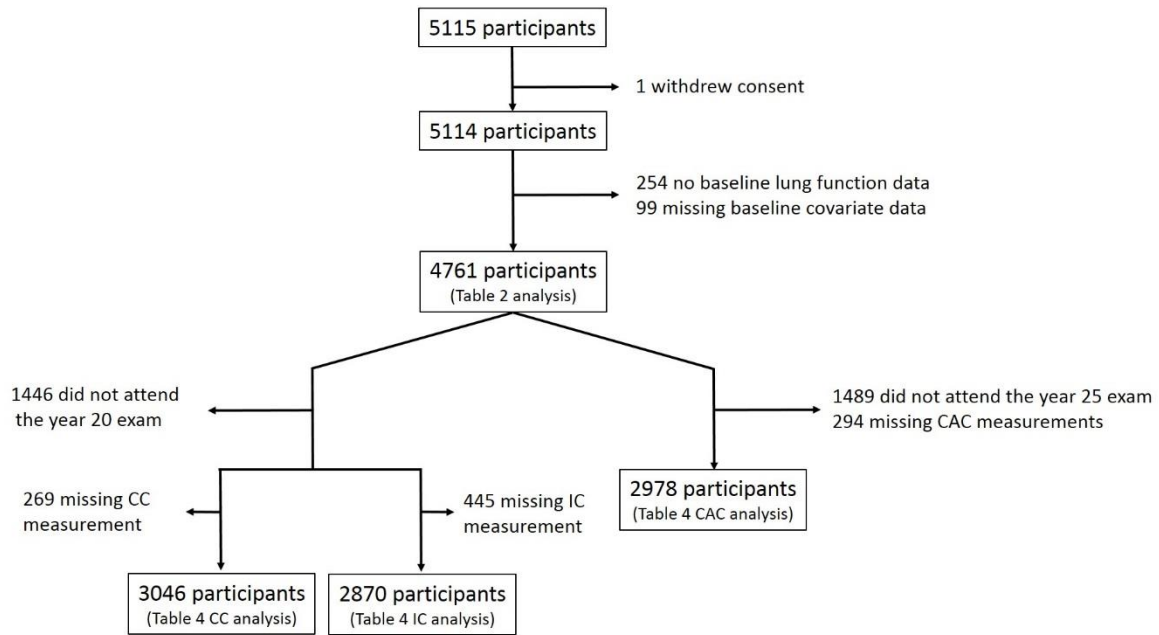

CC: common carotid IMT, IC: internal carotid IMT, CAC: coronary artery calcium

**Figure S2. Cardiovascular Disease Event Rate and Prevalence of Coronary Artery Calcium Across Lung Function Quintiles.**

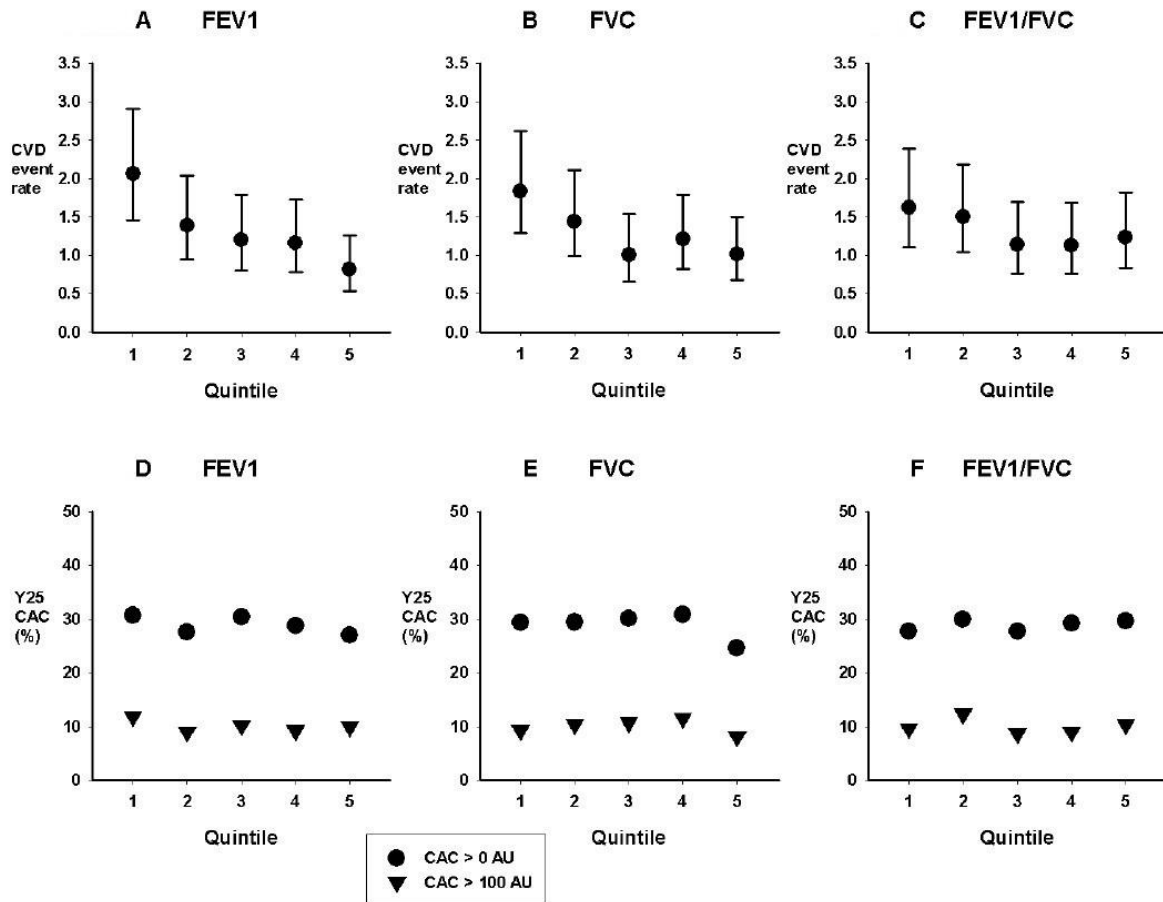

**A:** CVD event rate per 1000-person years across quintiles of FEV1 adjusted for age, race and sex. FEV1 percent predicted ranges for quintiles; 1: 46.2230 - 88.4222, 2: 88.4268 - 95.0391, 3: 95.0394 - 100.6025, 4: 100.6254 - 107.4562, 5: 107.4596 - 152.0148. **B:** CVD event rate per 1000-person years across quintiles of FVC adjusted for age, race and sex. FVC percent predicted ranges for quintiles; 1: 50.3075-90.8605, 2: 90.8622-97.3808, 3: 97.3907-102.8751, 4: 102.8984-109.8769, 5: 109.8868-169.2371. **C:** CVD event rate per 1000-person years across quintiles of FEV1/FVC ratio adjusted for age, race and sex. FEV1/FVC ratio ranges for quintiles; 1: 41.9795-78.1533, 2: 78.1734-82.0513, 3: 82.0588-85.0467, 4: 85.0485-88.2637, 5: 88.2716-100.00. **D:** Prevalence of CAC (closed circle CAC score > 0 AU, triangle CAC score > 100 AU) across quintiles of FEV1. FEV1 percent predicted ranges for quintiles; 1: 46.2230 - 88.4222, 2: 88.4268 - 95.0391, 3: 95.0394 - 100.6025, 4: 100.6254 - 107.4562, 5: 107.4596 - 152.0148. **E:** Prevalence of CAC (closed circle CAC score > 0 AU, triangle CAC score > 100 AU) across quintiles of FVC. FVC percent predicted ranges for quintiles; 1: 50.3075-90.8605, 2: 90.8622-97.3808, 3: 97.3907-102.8751, 4: 102.8984-109.8769, 5: 109.8868-169.2371. **F:** Prevalence of CAC (closed circle CAC score > 0 AU, triangle CAC score > 100 AU) across quintiles of FEV1/FVC ratio. FEV1/FVC ratio ranges for quintiles; 1: 41.9795-78.1533, 2: 78.1734-82.0513, 3: 82.0588-85.0467, 4: 85.0485-88.2637, 5: 88.2716-100.00. CVD: cardiovascular disease, FEV1: forced expiratory volume in 1 second, FVC: forced vital capacity, CAC: coronary artery calcium.
